# Supplementary material for: Roles of WNT6 in Sheep Endometrial Epithelial Cell Cycle Progression and Uterine Glands Organogenesis
Source: MDPI journal article supplement (doi:10.3390/vetsci8120316), 2021-12-09
Supplement: s1 [file s1]

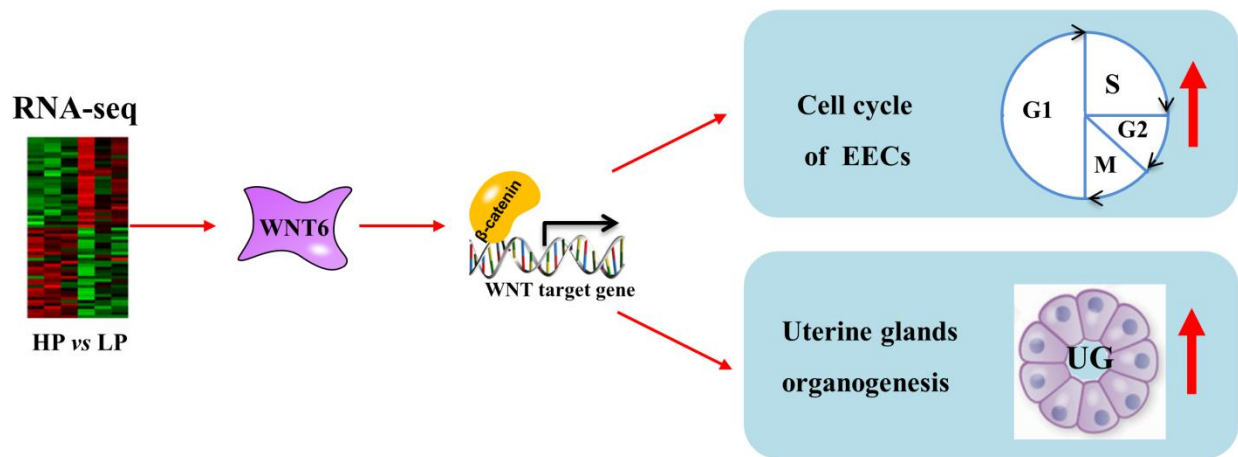

Additional file 4. Roles of WNT6 in EECs cycle progression and UGs organogenesis. EECs, endometrial epithelial cells; UGs, uterine glands; HP, high prolificacy rate Hu sheep; LP, low prolificacy rate Hu sheep.
